# Supplementary material for: A novel patient-derived 3D model recapitulates mantle cell lymphoma lymph node signaling, immune profile and in vivo ibrutinib responses
Source: PubMed Central journal article supplement (PMC10244172; doi:10.1038/s41375-023-01885-1), 2023-04-08
Supplement: 41375_2023_1885_MOESM1_ESM.pdf [file 41375_2023_1885_MOESM1_ESM.pdf]

## **SUPPLEMENTAL METHODS**

### **Patient samples and healthy donor peripheral blood mononuclear cells**

MCL primary samples used in this study belong to Hematopathology collection, registered in the Biobank of IDIBAPS-Hospital Clínic, Barcelona (R121004-094) and in the National Registry of Biobanks-ISCIII (C.0000397), according to *Real Decreto 1716/2011*. This collection corresponds to biological material remaining from the samples used for the diagnosis, according to the World Health Organization (WHO), in the Hematopathology Unit of Hospital Clínic de Barcelona (HCB, Barcelona, Spain). Informed consent has been obtained from each patient in accordance with the Institutional Ethics Committee of the HCB and the Declaration of Helsinki.

Peripheral blood mononuclear cells (PBMCs) were obtained from healthy donor buffy coats provided by Banc de Sang i Teixits (Barcelona, Spain) after Ficoll-Paque gradient separation (GE Healthcare, Chicago, IL, USA). Monocytes were purified using CD14<sup>+</sup> magnetic beads and LS columns (Miltenyi Biotec, Bergisch Gladbach, Germany) and purity >98% was verified by flow cytometry (FACS Fortessa (BD Biosciences, Franklin Lanes, NJ, USA)). Monocytes were cryopreserved with 10% DMSO (Sigma-Aldrich, St. Louis, MO, USA) and stored in liquid nitrogen until use at IDIBAPS Biobank.

### **MCL-PDLS imaging**

PDLS formation and growth were monitored by brightfield illumination on the automated digital microscope Cytation 1 (Biotek, Agilent, Santa Clara, CA, USA) under temperature (37°C) and CO<sub>2</sub>/O<sub>2</sub> gas control. Z-stacking function (n=5) was always performed to account for the third dimension. Image analysis and Z-projection were done with manufacturer's software Gen 5 (Biotek).

PDLS were also characterized by Selective Plane Illumination Microscopy (SPIM). Day 7 PDLS were fixed in 4% paraformaldehyde (PFA) for 12h, then PFA was diluted to 0.5% with PBS after several rinse cycles, and finally replaced by blocking/permeabilization buffer (PBS + 2% FBS + 2% BSA + 0.6% Triton + 0.01% Azide) and incubated overnight (ON) with agitation at room temperature (RT). PDLS were then labeled with 10 µg/mL propidium iodide (Thermo Fisher Scientific) and incubated for 4h at RT with agitation, washed and included in agarose.

Then, PDLS included in agarose were cleared using methanol and Benzyl Alcohol/Benzyl Benzoate (BABB) reagent. Finally, PDLS included were imaged by SPIM microscope (ZEISS Lightsheet Z.7, Imactiv 3D, Toulouse) and image-processing algorithms were developed in MATLAB.

### **Monocyte-Macrophage differentiation and polarization analysis**

To assess MCL induced monocyte-macrophage differentiation /polarization, CD11b<sup>+</sup> Far Red<sup>+</sup> cells were recovered by cells sorting (FACS Aria, BD) from PDLS (day 7), and RNA isolated with TRIZol following manufacturer's protocol (Thermo Fisher Scientific). cDNA was synthesized using Preamp RT Master Mix (Fluidigm, San Francisco, CA, USA). Next, cDNA was pre-amplified for the following genes: *CXCL11*, *CCL5*, *MRC1*, *CCL22*, *PMAIP1*, *RSG2*, *GUSB*, *ACTB*, *B2M* using pre-designed TaqMan probes (Thermo Scientific) and PreAmp Master Mix (Fluidigm).

Quantitative real-time PCR (qPCR) was then performed on a StepOne Real-Time PCR System (Thermo Fisher Scientific) using the same probes as the preamplification. Samples were analyzed in duplicate and expression was normalized using the mean of the three endogenous genes: *GUSB*, *ACTB*, *B2M*.

To evaluate the degree of M1/M2 polarization MCL-macrophages were compared with M1 or M2-polarized macrophages generated as follows: monocytes obtained from PBMCs as previously described were seeded in 6-wells plates at  $0.5 \times 10^6$  cells/mL in enriched medium supplemented with macrophage colony stimulating factor (M-CSF) (ThermoFisher Scientific) at 100 ng/mL. After 6 days, additional stimuli were provided to obtain M1-polarized macrophages ((20ng/mL IFN $\gamma$  (Gibco, Thermo Fisher Scientific) + 100ng/mL LPS (Sigma-Aldrich)) or M2-polarized macrophages (20ng/mL IL-4 (PeproTech, Rocky Hill, NJ)) for 24h.

### **MCL-PDLS immune profile and activation**

MCL-PDLS (day 3 and day 7) immune profile were both characterized with several panels for B (CD20+) cells, T (CD4+ and CD8+) cells and monocytes/macrophages (CD11b+) using the following antibodies PD1, TIGIT, TIM-3, CD27, CD70, CD66a, CD112, CD155, PD-L1, CD47, SIRP $\alpha$  followed by flow cytometry analysis. PBMCs from healthy donors were used as controls. A complete list of antibodies is provided in supplemental table S1.

Granzyme B and interferon (IFN)- $\gamma$  were used as read-out of T cell activation and were analyzed in cell culture supernatants using Cytometric Bead Array (CBA) kits and FACS Fortessa (BD Biosciences) following manufacturer's instructions. Data was analyzed using FCAP Array<sup>TM</sup> v.3.0 Software (BD Biosciences).

### **RNA-seq and data analysis**

Day 7 PDLS was disaggregated, labelled with LIVE/DEAD Aqua, CD20 - eIF450 (Thermo Fisher Scientific) and CD3-FITC (BD Biosciences). CD20<sup>+</sup>, CD3<sup>-</sup> Aqua<sup>-</sup> cells were recovered using a BD FACSAria II sorter (Cytometry and cell sorting facility, IDIBAPS) and RNA extracted as before. Likewise, CD20<sup>+</sup>, CD3<sup>-</sup> Aqua<sup>-</sup> cells isolated from the original MCL sample at thawing (day 0) were used as a comparator for RNA-seq studies.

RNA was assayed for quantity and quality using Qubit RNA HS Assay (Life Technologies) and RNA 6000 Nano Assay on a Bioanalyzer 2100. Stranded RNA-seq libraries were performed for 150 ng of mRNA using the TruSeq library kit (Illumina, San Diego, CA, USA). Libraries were sequenced on a NextSeq2000 (Illumina) in a 2x50bp length with a coverage of >40 million paired-reads per sample.

Sequencing reads were trimmed using trimmomatic (version 0.38),<sup>1</sup> and ribosomal RNA reads were filtered out using SortMeRNA (version 2.1b).<sup>2</sup> Gene-level counts (GRCh38.p13; Ensembl release 100) were calculated using kallisto (version 0.46.1)<sup>3</sup> and tximport (version 1.6.0).<sup>4</sup> Differential expression was conducted using DESeq2 (version 1.18.1).<sup>5</sup> Shrinkage of effect size was performed using the apeglm method.<sup>6</sup> Adjusted *P* value (*Q*) <0.10 and absolute log<sub>2</sub>-transformed fold change >0.5 were used to identify differentially expressed genes (DEGs).

Gene-set enrichment analyses (GSEAs) were conducted with GSEA software (version 4.2.3),<sup>7</sup> using the pre-ranked modality and log<sub>2</sub>FC results obtained from DESeq2 as input data. Hallmark gene sets, the C2 curated gene sets, the C3 motif gene sets, the C5 gene ontology gene sets (Molecular Signature Database v7.5), and custom gene sets<sup>8,9</sup> were used. Heatmaps of selected genes were generated using GraphPad software. RNA-seq data have been deposited at the European Genome-phenome Archive (accession number EGAS00001006964) and will be publicly accessible at the time of publication.

### **Metadata comparative analysis**

mRNA relative expression levels of selected immune checkpoints in whole lysates of Mantle Cell Lymphoma lymph nodes (MCL-LN, n=199) was compared with normal tonsils (TONSIL n=30) according to GEP public databases (GSE21452, GSE93291, GSE70910, GSE70927, GSE132929, GSE3526, GSE7307, GSE39503, GSE43346, GSE65135, GSE65136 and GSE71810). These selected data were all generated with Affymetrix Human Genome U133 Plus 2.0. Briefly, CEL files were normalized using the Expression Console™ Software v1.4.1.46 (Affymetrix). To take in consideration the batch effect, join data were normalized using the Limma package included in Transcriptome Analysis console (Applied Biosystems).

### **Statistical analysis**

Data were analyzed using Prism Software 8.0 (GraphPad Software, San Diego, CA, USA). Depending on the assay and based on Shapiro-Wilk normality test, paired t test or Wilcoxon test were used. Data were represented as the mean values of the patients. Differences between the results of comparative tests were

considered significant if the two-sided P value was less than 0.05. The statistical significance convention used along the manuscript was as follows: \*  $p < 0.05$ , \*\*  $p < 0.01$ , \*\*\*  $p < 0.001$  and \*\*\*\*  $p < 0.0001$ .

## Bibliography

- 1 Bolger AM, Lohse M, Usadel B. Trimmomatic: a flexible trimmer for Illumina sequence data. *Bioinformatics* 2014; **30**: 2114–2120.
- 2 Kopylova E, Noé L, Touzet H. SortMeRNA: fast and accurate filtering of ribosomal RNAs in metatranscriptomic data. *Bioinformatics* 2012; **28**: 3211–3217.
- 3 Bray NL, Pimentel H, Melsted P, Pachter L. Near-optimal probabilistic RNA-seq quantification. *Nat Biotechnol* 2016; **34**: 525–527.
- 4 Sonesson C, Love MI, Robinson MD. Differential analyses for RNA-seq: transcript-level estimates improve gene-level inferences. *F1000Research* 2015; **4**: 1521.
- 5 Love MI, Huber W, Anders S. Moderated estimation of fold change and dispersion for RNA-seq data with DESeq2. *Genome Biol* 2014; **15**: 550.
- 6 Zhu A, Ibrahim JG, Love MI. Heavy-tailed prior distributions for sequence count data: removing the noise and preserving large differences. *Bioinformatics* 2019; **35**: 2084–2092.
- 7 Subramanian A, Kuehn H, Gould J, Tamayo P, Mesirov JP. GSEA-P: a desktop application for Gene Set Enrichment Analysis. *Bioinformatics* 2007; **23**: 3251–3253.
- 8 Saba NS, Liu D, Herman SEMM, Underbayev C, Tian X, Behrend D *et al*. Pathogenic role of B-cell receptor signaling and canonical NF- $\kappa$ B activation in mantle cell lymphoma. *Blood* 2016; **128**: 82–92.
- 9 Rosenwald A, Wright G, Wiestner A, Chan WC, Connors JM, Campo E *et al*. The proliferation gene expression signature is a quantitative integrator of oncogenic events that predicts survival in mantle cell lymphoma. *Cancer Cell* 2003; **3**: 185–197.

Figure S1

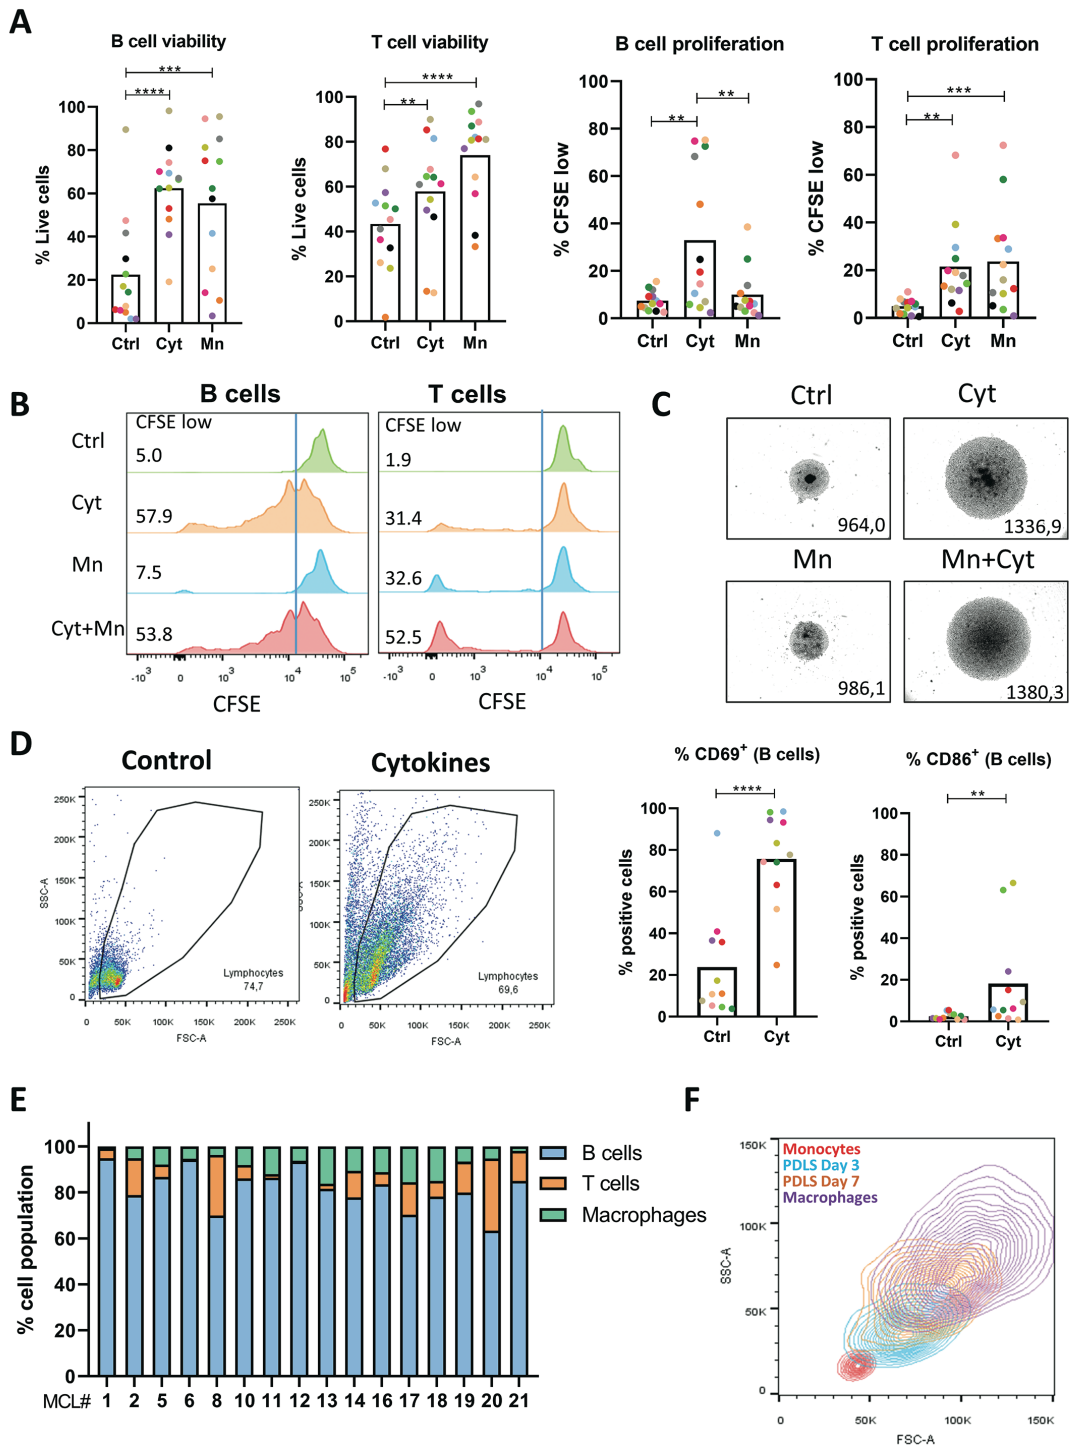

**Figure S1. Effect of cytokines and/or monocytes on PDLs culture. (A)** B/T cell viability and proliferation (%CFSE low) of MCL-PDLs cultured during 7 days with cytokines (Cyt) or monocytes (Mn) compared to the control (Ctrl) condition of non-stimulated PDLs. **(B)** Representative CFSE histogram (MCL10) plot showing B- and T cell proliferation when adding cytokines and/or monocytes. Percentage of CFSE low cells is indicated. **(C)** PDLs (MCL13) brightfield imaging (Cytation 1, x40 magnification) with cytokines (Cyt) and/or monocytes (Mn) stimuli compared to control (Ctrl) condition. Size in μm is indicated **(D)** Density plots illustrates the increase in cell growth (FSC-A) and cell complexity (SSC-A) of PDLs cultured with only cytokines for 7 days. B cell activation was assessed by the percentage of CD69 and CD86 positive cells. **(E)** B, T and monocyte distribution after 7 days with cytokines and monocytes. **(F)** Evolution in size (FSC-A) and complexity (SSC-A) of CD11b<sup>+</sup> isolated from the PDLs (MCL13) after 3 or 7 days in PDLs media, compared to monocytes or to macrophages differentiated in 2D with M-CSF.

Figure S2

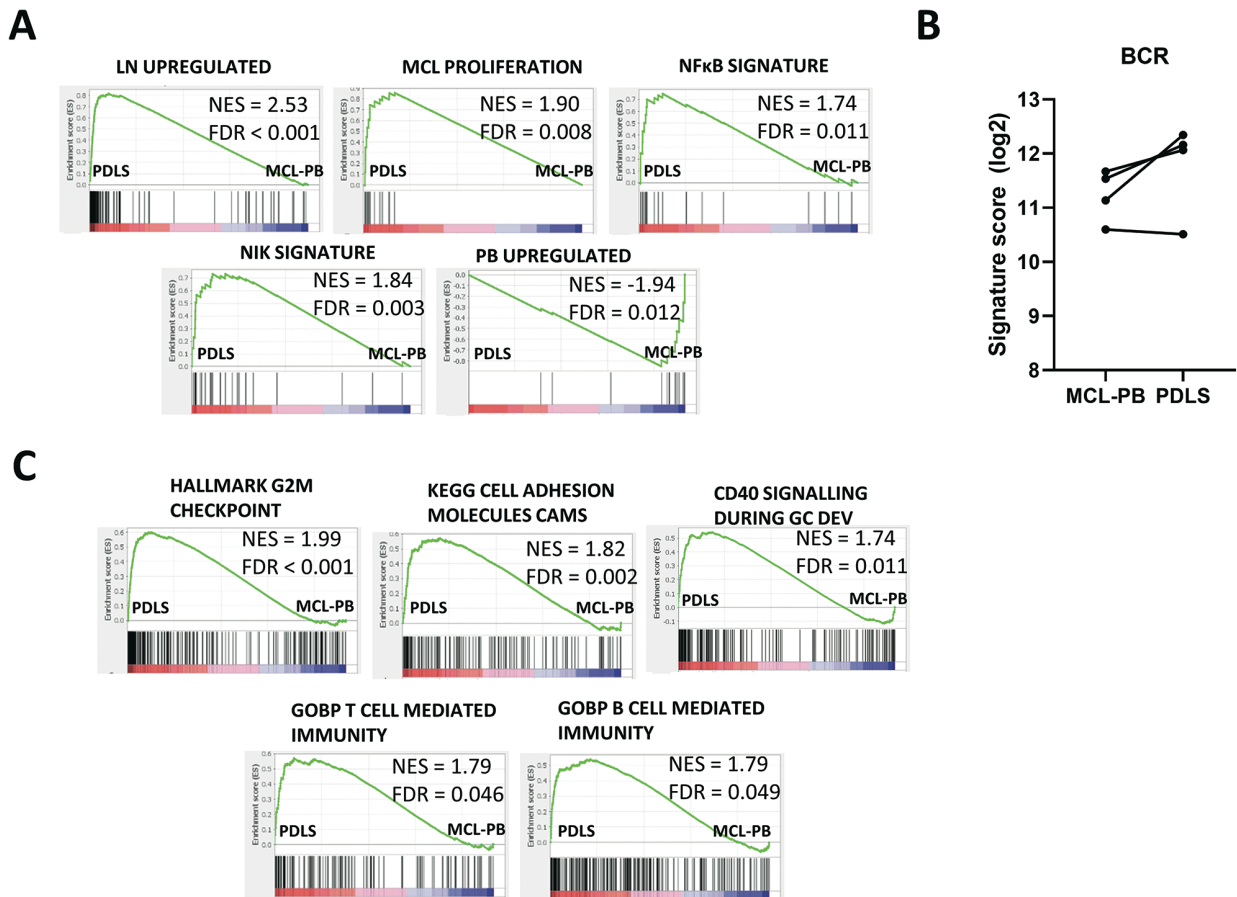

**Figure S2. MCL-PDLS GSEA analysis. (A)** GSEA enrichment plots representing relevant pathways in MCL pathogenesis, with significant increase or decrease in the signature score (Figure 2C). **(B)** BCR signature score calculated as explained in Figure 2C, detailed by each individual patient. **(C)** GSEA enrichment plots representing up-regulated pathways in the PDLS, related to cell cycle, adhesion and immune system.

**Figure S3**

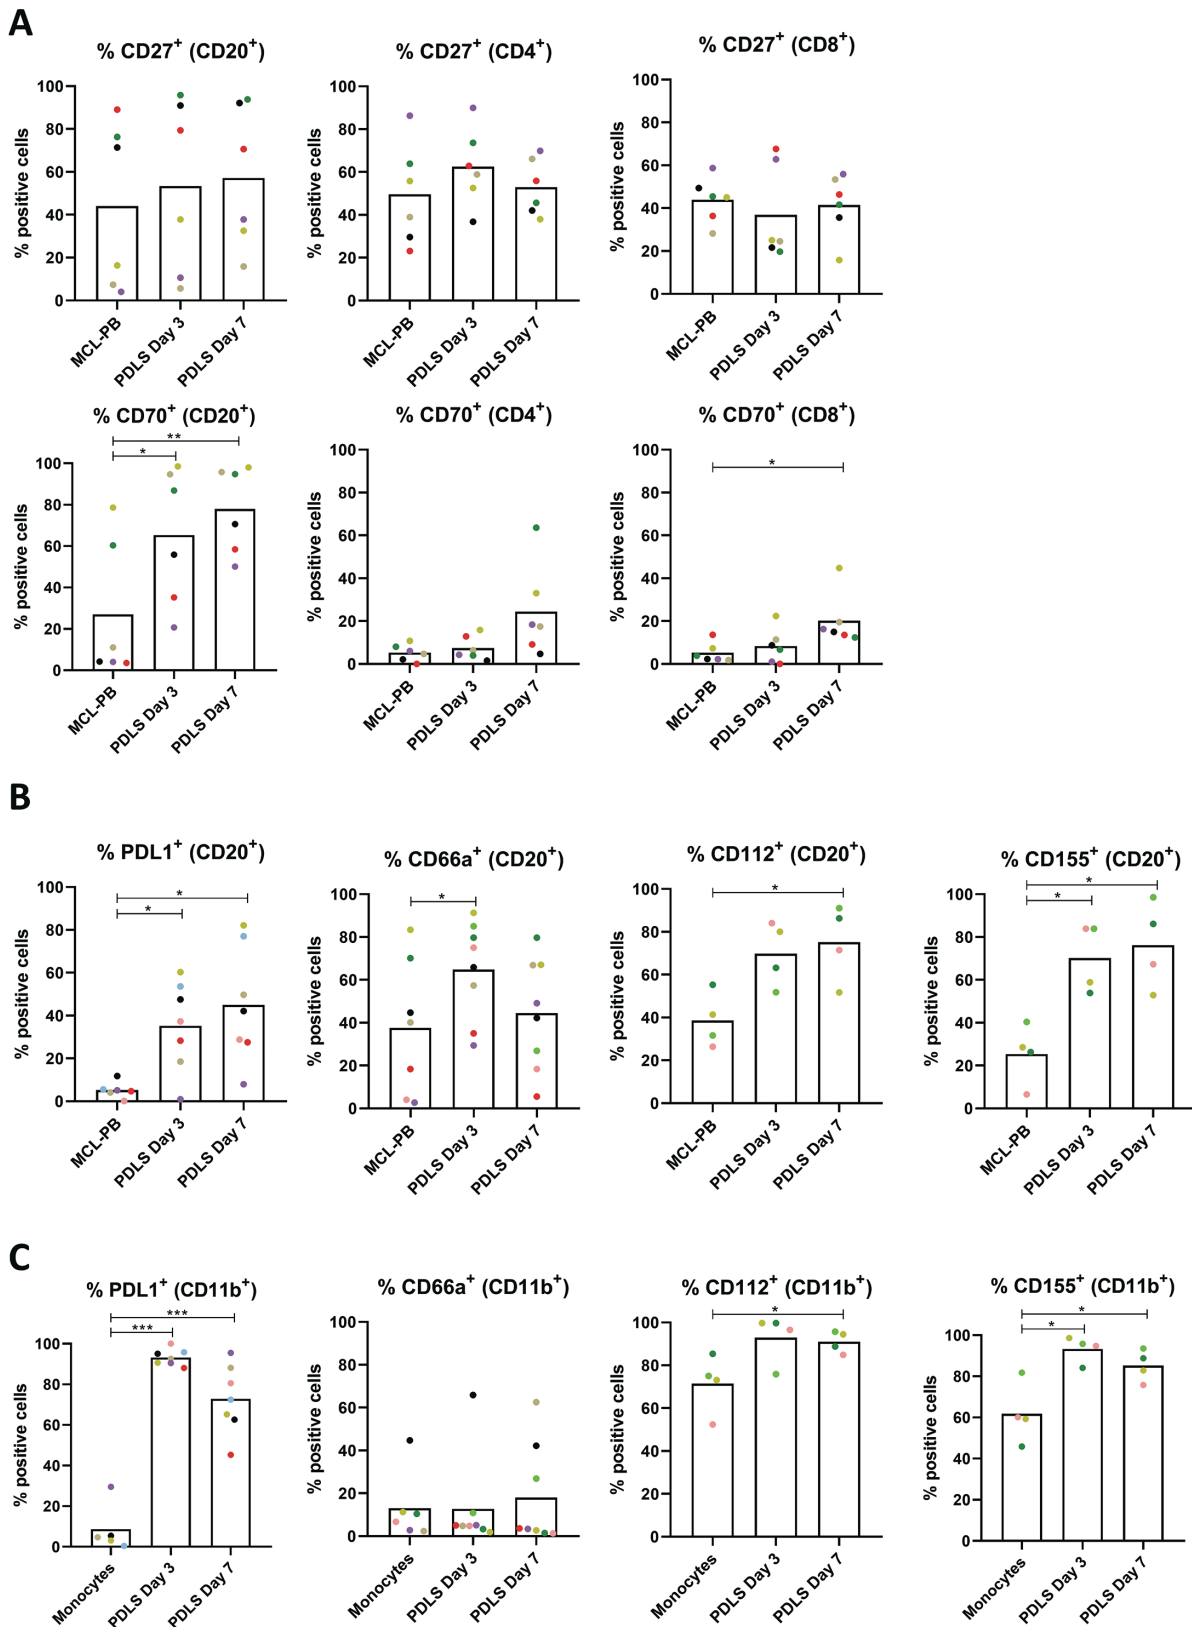

**Figure S3. Up-regulation of immune modulators markers in MCL-PDLS. (A)** Percentage of positive cells for CD70 and CD27 in B cells and CD4/CD8 T cells from MCL-PDLS (n=6) . **(B)** Percentage of positive cells of PD-L1, CD66a, CD112 and CD155 in tumor B cell population in the PB sample and from MCL-PDLS at day 3 or day 7 of culture (n=4-8). **(C)** Percentage of positive cells of ICP ligands in monocytes and macrophages from PDLS after 3 or 7 days of culture (n=4-8).

**Figure S4**

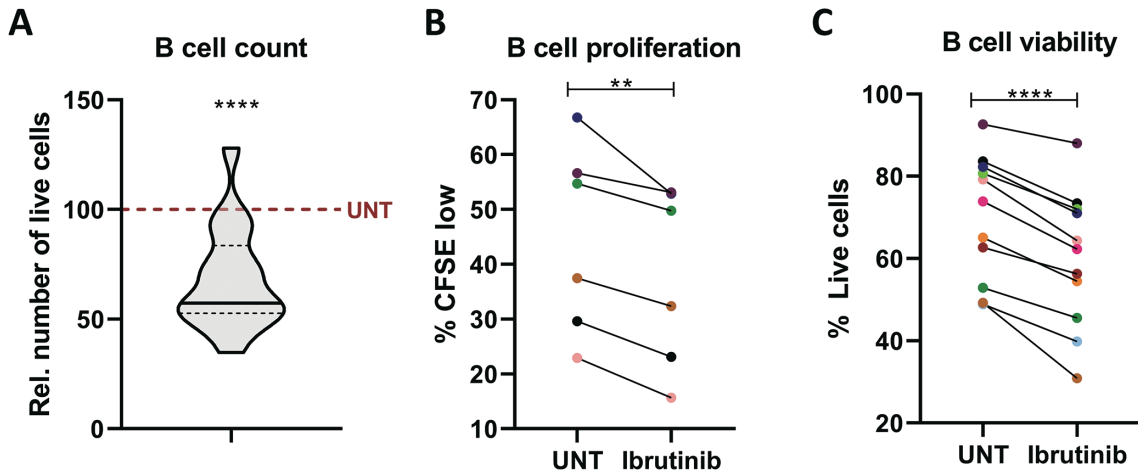

**Figure**

**S4. Ibrutinib is active in MCL-PDLS.** MCL-PDLS were treated at day 3 with ibrutinib. B cell count (n=17) (A), B cell proliferation quantified by the percentage of CFSE low (B) and B cell viability measured by percentage of negative LIVE/DEAD (C) were assessed after 72h of ibrutinib treatment compared to untreated (UNT) samples.

**Figure S5**

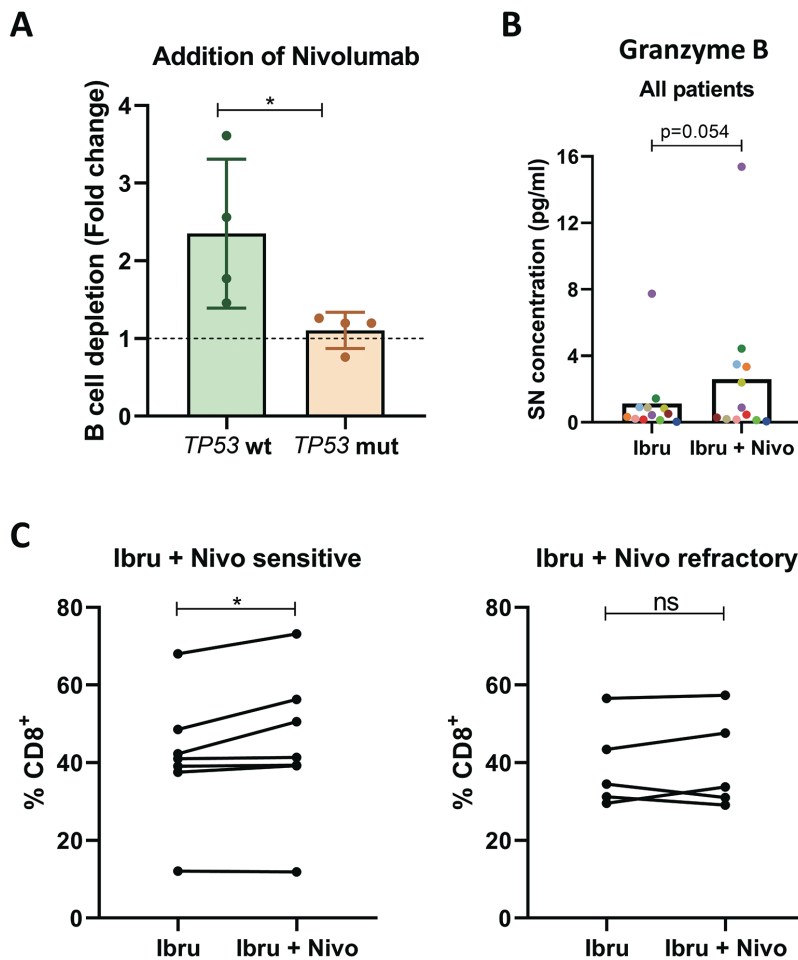

**Figure S5. Ibrutinib and nivolumab combination in MCL-PDLS.** (A) Effect of adding nivolumab to ibrutinib treatment in patients with TP53 gene mutated (mut) or non-mutated (wild-type (wt)), represented as the fold change of B cell depletion. (B) Granzyme B concentration by CBA comparing ibrutinib monotherapy or in combination with nivolumab. (C) Percentage of CD8+ T cells (CD3+gated) after ibrutinib or ibrutinib +nivolumab in sensitive or resistant MCL-PDLS to the combination.



**Supplemental video 1.** Time-lapse video of MCL-PDLS (MCL1) evolution from D1 to D7. Images were taken every 12h in a Cytation 1 device (magnification x40).

**Supplemental video 2.** 3D reconstruction of MCL-PDLS (MCL1) by SPIM microscopy using MATLAB software.

**SUPPLEMENTARY TABLES****Table S1. Antibodies used in flow cytometry**

| <b>Target</b> | <b>Conjugate</b> | <b>Clone</b> | <b>Dilution</b> |
|---------------|------------------|--------------|-----------------|
| CD112         | PE               | R2.525       | 1/40            |
| CD155         | BV605            | SKII.4       | 1/100           |
| CD19          | PE               | SJ25C1       | 1/200           |
| CD20          | eFluor 450       | 2H7          | 1/50            |
| CD27          | PE-Cy7           | LG.7F9       | 1/100           |
| CD3           | PE-Cy5           | UCHT1        | 1.5/100         |
| CD4           | SB600            | RPA-T4       | 1.5/100         |
| CD47          | PE-Cy7           | B6H12        | 1/20            |
| CD66a         | AF488            | 283340       | 1/50            |
| CD70          | APC              | REA292       | 1/20            |
| CD8           | APC-H7           | SK1          | 1/100           |
| PD-1          | PE-Cy7           | EH12.1       | 1/50            |
| PD-L1         | PE               | MIH1         | 1/200           |
| SIRP $\alpha$ | APC              | 15-414       | 1/200           |
| TIGIT         | APC              | MBSA43       | 1/50            |
| TIM-3         | PE               | F38-2E2      | 1/50            |

**Table S2. Leading edge genes of specific signatures from Figure 2C**

| <b>LN</b>         |           |         |         | <b>PB</b>   |
|-------------------|-----------|---------|---------|-------------|
|                   | CENPA     | KIF20A  | PBK     |             |
|                   | CENPE     | KIF23   | PLK4    | CKAP4       |
| ANLN              | CENPF     | KIF2C   | POLQ    | KLF2        |
| ASPM              | CENPM     | KIFC1   | PTPN7   | KLF9        |
| AURKA             | CEP55     | LTBP1   | RRM2    | MXI1        |
| AURKB             | CLSPN     | MCM10   | SIRPA   | PCGF5       |
| BID               | CTNNA1    | MELK    | SKA3    | RIN3        |
| BUB1              | DLGAP5    | MKI67   | SMC2    | SEMA4B      |
| BUB1B             | DTL       | MND1    | SPAG5   | UCKL1       |
| CCL22             | E2F8      | MRPS14  | TOP2A   |             |
| CDC20             | ESCO2     | NCAPG   | TOX     |             |
| CDC25A            | ESPL1     | NCAPG2  | TPX2    | <b>NFKB</b> |
| CDC45             | EXO1      | NCAPH   | TYMS    |             |
| CDC6              | FAM72A    | NEIL3   | UBE2C   | BCL2A1      |
| CDCA3             | FEN1      | NEK2    | UBE2T   | CCL3        |
| CDCA5             | FOXM1     | NEURL1B | UHRF1   | CCL4        |
| CDCA8             | HJURP     | NLRP3   |         | DUSP2       |
| CDK1              | IPCEF1    | NME1    |         | EBI3        |
| CDKN3             | KIF14     | NUF2    |         | ID2         |
|                   |           |         |         | IL12B       |
|                   |           |         |         | LTA         |
| <b>MCL Prolif</b> | H2AZ1     | ODC1    | SET     | NFKBIE      |
|                   | HDAC2     | PCNA    | SF3B3   | RGS1        |
| AIMP2             | HDGF      | POLD2   | SLC25A3 | TNF         |
| AP3S1             | HNRNPA1   | POLE3   |         |             |
| APEX1             | HNRNPA2B1 | PPIA    | SNRPA   |             |
| C1QBP             | HNRNPA3   | PPM1G   | SNRPA1  | <b>NIK</b>  |
| CBX3              | HNRNPC    | PRDX4   | SNRPB2  |             |
| CCT2              | HNRNPD    | PRPF31  | SNRPD1  | ANXA4       |
| CCT3              | HNRNPR    | PSMA1   | SNRPD2  | C17orf49    |
| CCT4              | HNRNPU    | PSMA2   | SNRPG   | CABLES1     |
| CCT5              | HPRT1     | PSMA4   | SRM     | CCDC28B     |
| CCT7              | HSP90AB1  | PSMA6   | SRSF2   | CFLAR       |
| CDC20             | HSPD1     | PSMA7   | SRSF3   | DOK5        |
| CDC45             | HSPE1     | PSMB2   | SRSF7   | EPB41L4B    |
| CDK4              | IARS1     | PSMB3   | SSB     | HLA-DQA1    |
| CLNS1A            | IFRD1     | PSMC4   | SSBP1   | HLA-DRB1    |
| CNBP              | ILF2      | PSMC6   | SYNCRIP | HVCN1       |
| COP55             | KARS1     | PSMD1   | TARDBP  | IL21R       |
| COX5A             | KPNA2     | PSMD14  | TCP1    | L1CAM       |
| CTPS1             | LDHA      | PSMD3   | TOMM70  | LMCD1       |
| DEK               | LSM7      | PSMD7   | TRA2B   | MGAT3       |
| EEF1B2            | MAD2L1    | PTGES3  | TRIM28  | RASGRP3     |
| EIF1AX            | MCM2      | PWP1    | TUFM    | SEMA4A      |
| EIF2S1            | MCM4      | RAN     | TXNL4A  | TRAF3IP3    |
| EIF2S2            | MCM6      | RANBP1  | UBE2L3  |             |
| EIF3B             | MCM7      | RFC4    | USP1    |             |
| EIF4A1            | MRPL23    | RPL18   | VBP1    |             |
| EIF4E             | MRPL9     | RPL34   | XRCC6   |             |
| ERH               | MRPS18B   | RPL6    | YWHAE   |             |
| EXOSC7            | NDUFAB1   | RPS2    |         |             |
| FBL               | NHP2      | RPS5    |         |             |
| GLO1              | NME1      | RRM1    |         |             |
| GNL3              | NOLC1     | RRP9    |         |             |
| GOT2              | NOP16     | RUVBL2  |         |             |
| GSPT1             | NPM1      | SERBP1  |         |             |

**Table S3. Gene sets (by biological process) overrepresented in MCL-PDLs compared to unstimulated (MCL-PB) controls**

| Biological process                 | # of enriched gene sets | NES (max) | FDR, q value (min) |
|------------------------------------|-------------------------|-----------|--------------------|
| <b>Proliferation</b>               |                         |           |                    |
| Cell cycle regulation              | 18                      | 2,31      | <0,001             |
| DNA replication                    | 31                      | 2         | <0,001             |
| MYC regulated genes                | 1                       | 1.64      | 0.008              |
| KRAS pathway                       | 1                       | 1.51      | 0.024              |
| <b>Immune pathways</b>             |                         |           |                    |
| Chemokines                         | 5                       | 2,11      | <0,001             |
| Allograft reaction                 | 3                       | 2,02      | <0,001             |
| Immune checkpoint control          | 1                       | 1,97      | 0.002              |
| Antigen presentation               | 9                       | 1,91      | 0,013              |
| Interleukins                       | 3                       | 1,84      | 0,007              |
| Cytokines                          | 2                       | 1,75      | 0,035              |
| Immune response                    | 22                      | 1,75      | 0.020              |
| CD40-CD40L signalling              | 1                       | 1,74      | 0,011              |
| <b>Survival pathways</b>           |                         |           |                    |
| NFκB                               | 8                       | 1,94      | 0,001              |
| TNF                                | 3                       | 1,75      | 0,037              |
| <b>Cellular processes</b>          |                         |           |                    |
| Protein synthesis                  | 10                      | 3,01      | 0,001              |
| RNA synthesis                      | 4                       | 1,87      | 0,006              |
| Cell adhesion                      | 2                       | 1,82      | 0,002              |
| Proteasome                         | 2                       | 1,71      | 0,011              |
| <b>Metabolic pathways</b>          |                         |           |                    |
| Oxidative phosphorylation (OXPHOS) | 13                      | 1,96      | 0,002              |
| Glucose metabolism                 | 6                       | 1,72      | 0,023              |
| Fatty acid metabolism              | 4                       | 1,72      | 0,023              |
| Aminoacid metabolism               | 3                       | 1,69      | 0,028              |
| <b>DNA damage</b>                  |                         |           |                    |
| DNA damage/repair                  | 7                       | 1,94      | 0,002              |
| p53                                | 1                       | 1,65      | 0,04               |
| <b>Others</b>                      |                         |           |                    |
| Telomeres                          | 2                       | 1,77      | 0,016              |
| Redox balance                      | 4                       | 1,73      | 0,017              |

GSEA was used to test for significant enrichment of defined gene signatures. NES indicates Normalized Enriched Score; FDR, False Discovery Rate. Threshold FDR<0.05 and NES>1.5. Custom genes set were experimentally derived and downloaded from <http://lymphochip.nih.gov/signaturedb/index.html>. C2CP, C3, C5 and H gene sets were obtained from the Molecular Signature Database (v2.5).

**Table S4. Complete GSEA results of MCL-PDLs compared to unstimulated (MCL-PB) controls**

| GENE SET                                                                        | SIZE | NES  | FDR q-val |
|---------------------------------------------------------------------------------|------|------|-----------|
| <b>Allograft reaction</b>                                                       |      |      |           |
| KEGG_GRAFT_VERSUS_HOST_DISEASE                                                  | 39   | 2.02 | 0.000     |
| KEGG_ALLOGRAFT_REJECTION                                                        | 37   | 1.94 | 0.000     |
| HALLMARK_ALLOGRAFT_REJECTION                                                    | 195  | 1.77 | 0.002     |
| <b>Aminoacids Metabolism</b>                                                    |      |      |           |
| KEGG_VALINE_LEUCINE_AND_ISOLEUCINE_DEGRADATION                                  | 44   | 1.64 | 0.023     |
| KEGG_TRYPTOPHAN_METABOLISM                                                      | 40   | 1.63 | 0.025     |
| REACTOME_SELENOAMINO_ACID_METABOLISM                                            | 118  | 1.69 | 0.028     |
| <b>Angiogenesis</b>                                                             |      |      |           |
| HALLMARK_ANGIOGENESIS                                                           | 33   | 1.61 | 0.010     |
| <b>Antigen presentation</b>                                                     |      |      |           |
| GOBP_ANTIGEN_PROCESSING_AND_PRESENTATION                                        | 107  | 1.91 | 0.013     |
| REACTOME_ANTIGEN_PROCESSING_CROSS_PRESENTATION                                  | 106  | 1.86 | 0.006     |
| GOBP_ANTIGEN_PROCESSING_AND_PRESENTATION_OF_ENDOGENOUS_ANTIGEN                  | 26   | 1.84 | 0.032     |
| GOBP_ANTIGEN_PROCESSING_AND_PRESENTATION_OF_EXOGENOUS_ANTIGEN                   | 47   | 1.82 | 0.034     |
| GOBP_PEPTIDE_ANTIGEN_ASSEMBLY_WITH_MHC_CLASS_II_PROTEIN_COMPLEX                 | 16   | 1.83 | 0.036     |
| GOBP_PEPTIDE_ANTIGEN_ASSEMBLY_WITH_MHC_PROTEIN_COMPLEX                          | 20   | 1.82 | 0.034     |
| MHC CLASS I                                                                     | 7    | 1.50 | 0.096     |
| KEGG_ANTIGEN_PROCESSING_AND_PRESENTATION                                        | 73   | 1.76 | 0.006     |
| REACTOME_CROSS_PRESENTATION_OF_SOLUBLE_EXOGENOUS_ANTIGENS_ENDOSOMES             | 50   | 1.8  | 0.012     |
| <b>CD40-CD40L signalling</b>                                                    |      |      |           |
| CD40 SIGNALLING DURING GC DEV                                                   | 150  | 1.74 | 0.011     |
| <b>Cell Adhesion</b>                                                            |      |      |           |
| HALLMARK_APICAL_JUNCTION                                                        | 197  | 1.55 | 0.018     |
| KEGG_CELL_ADHESION_MOLECULES_CAMS                                               | 131  | 1.82 | 0.002     |
| <b>Cell cycle regulation</b>                                                    |      |      |           |
| HALLMARK_E2F_TARGETS                                                            | 200  | 2.31 | 0.000     |
| HALLMARK_G2M_CHECKPOINT                                                         | 199  | 1.99 | 0.000     |
| HALLMARK_MITOTIC_SPINDLE                                                        | 199  | 1.59 | 0.013     |
| KEGG_CELL_CYCLE                                                                 | 124  | 1.65 | 0.023     |
| REACTOME_POLO_LIKE_KINASE_MEDIATED_EVENTS                                       | 16   | 1.73 | 0.021     |
| REACTOME_APC_C_MEDIATED_DEGRADATION_OF_CELL_CYCLE_PROTEINS                      | 88   | 1.94 | 0.002     |
| REACTOME_CELL_CYCLE_CHECKPOINTS                                                 | 289  | 1.92 | 0.003     |
| REACTOME_G2_M_CHECKPOINTS                                                       | 165  | 1.87 | 0.006     |
| REACTOME_S_PHASE                                                                | 162  | 1.84 | 0.007     |
| REACTOME_G1_S_SPECIFIC_TRANSCRIPTION                                            | 29   | 1.82 | 0.011     |
| REACTOME_MITOTIC_G1_PHASE_AND_G1_S_TRANSITION                                   | 149  | 1.81 | 0.012     |
| REACTOME_CYCLIN_A_B1_B2_ASSOCIATED_EVENTS_DURING_G2_M_TRANSITION                | 25   | 1.72 | 0.023     |
| REACTOME_TP53_REGULATES_TRANSCRIPTION_OF_GENES_INVOLVED_IN_G2_CELL_CYCLE_ARREST | 18   | 1.71 | 0.023     |
| REACTOME_MITOTIC_METAPHASE_AND_ANAPHASE                                         | 236  | 1.64 | 0.045     |
| GOBP_REGULATION_OF_CHROMOSOME_SEPARATION                                        | 69   | 1.97 | 0.010     |
| GOBP_MICROTUBULE_CYTOSKELETON_ORGANIZATION_INVOLVED_IN_MITOSIS                  | 153  | 1.83 | 0.036     |
| GOBP_MITOTIC_NUCLEAR_DIVISION                                                   | 291  | 1.82 | 0.035     |
| GOBP_MITOTIC_SPINDLE_ORGANIZATION                                               | 126  | 1.79 | 0.044     |
| <b>Chemokines</b>                                                               |      |      |           |
| REACTOME_CHEMOKINE_RECEPTORS_BIND_CHEMOKINES                                    | 53   | 1.86 | 0.006     |
| GOMF_CCR_CHEMOKINE_RECEPTOR_BINDING                                             | 34   | 2.11 | 0.000     |
| GOMF_CHEMOKINE_RECEPTOR_BINDING                                                 | 54   | 2.08 | 0.000     |
| GOMF_CHEMOKINE_ACTIVITY                                                         | 40   | 2.07 | 0.000     |
| GOMF_CHEMOATTRACTANT_ACTIVITY                                                   | 29   | 1.73 | 0.047     |
| <b>Cytokines</b>                                                                |      |      |           |
| KEGG_CYTOKINE_CYTOKINE_RECEPTOR_INTERACTION                                     | 240  | 1.57 | 0.041     |
| GOMF_CYTOKINE_ACTIVITY                                                          | 205  | 1.75 | 0.035     |
| <b>DNA damage/repair</b>                                                        |      |      |           |
| KEGG_MISMATCH_REPAIR                                                            | 23   | 1.77 | 0.005     |
| KEGG_BASE_EXCISION_REPAIR                                                       | 34   | 1.67 | 0.016     |
| KEGG_NUCLEOTIDE_EXCISION_REPAIR                                                 | 44   | 1.58 | 0.040     |
| REACTOME_ACTIVATION_OF_ATR_IN_RESPONSE_TO_REPLICATION_STRESS                    | 37   | 1.94 | 0.002     |
| REACTOME_BASE_EXCISION_REPAIR                                                   | 86   | 1.7  | 0.024     |
| REACTOME_DNA_DOUBLE_STRAND_BREAK_REPAIR                                         | 164  | 1.63 | 0.046     |
| REACTOME_MISMATCH_REPAIR                                                        | 15   | 1.62 | 0.050     |
| <b>DNA replication</b>                                                          |      |      |           |
| KEGG_DNA_REPLICATION                                                            | 36   | 2.00 | 0.000     |
| REACTOME_DNA_STRAND_ELONGATION                                                  | 32   | 2.02 | 0.001     |

|                                                                            |     |      |       |
|----------------------------------------------------------------------------|-----|------|-------|
| REACTOME_SYNTHESIS_OF_DNA                                                  | 120 | 2,01 | 0.000 |
| REACTOME_CHROMOSOME_MAINTENANCE                                            | 135 | 1,97 | 0.002 |
| REACTOME_DNA_REPLICATION                                                   | 186 | 1,96 | 0.002 |
| REACTOME_DEPOSITION_OF_NEW_CENPA_CONTAINING_NUCLEOSOMES_AT_THE_CENTROMERE  | 68  | 1,91 | 0.003 |
| REACTOME_ACTIVATION_OF_THE_PRE_REPLICATIVE_COMPLEX                         | 33  | 1,9  | 0.003 |
| REACTOME_DNA_REPLICATION_PRE_INITIATION                                    | 143 | 1,88 | 0.005 |
| REACTOME_MITOTIC_SPINDLE_CHECKPOINT                                        | 111 | 1,84 | 0.007 |
| REACTOME_SEPARATION_OF_SISTER_CHROMATIDS                                   | 191 | 1,72 | 0.023 |
| REACTOME_RESOLUTION_OF_SISTER_CHROMATID_COHESION                           | 126 | 1,72 | 0.023 |
| REACTOME_CONDENSATION_OF_PROPHASE_CHROMOSOMES                              | 69  | 1,67 | 0.034 |
| REACTOME_MITOTIC_PROMETAPHASE                                              | 203 | 1,67 | 0.035 |
| GOBP_MONOCYTE_CHEMOTAXIS                                                   | 62  | 2,08 | 0.000 |
| GOBP_MITOTIC_SISTER_CHROMATID_SEGREGATION                                  | 171 | 1,98 | 0.012 |
| GOBP_METAPHASE_ANAPHASE_TRANSITION_OF_CELL_CYCLE                           | 63  | 1,96 | 0.009 |
| GOBP_REGULATION_OF_CHROMOSOME_SEGREGATION                                  | 86  | 1,96 | 0.008 |
| GOBP_SISTER_CHROMATID_SEGREGATION                                          | 203 | 1,96 | 0.007 |
| GOBP_CENTROMERE_COMPLEX_ASSEMBLY                                           | 31  | 1,94 | 0.008 |
| GOBP_KINETOCHORE_ORGANIZATION                                              | 23  | 1,93 | 0.010 |
| GOBP_REGULATION_OF_MITOTIC_SISTER_CHROMATID_SEGREGATION                    | 45  | 1,92 | 0.011 |
| GOBP_CHROMOSOME_SEPARATION                                                 | 94  | 1,91 | 0.013 |
| GOBP_CHROMOSOME_SEGREGATION                                                | 343 | 1,89 | 0.017 |
| GOBP_NUCLEAR_CHROMOSOME_SEGREGATION                                        | 284 | 1,89 | 0.016 |
| GOBP_NEGATIVE_REGULATION_OF_METAPHASE_ANAPHASE_TRANSITION_OF_CELL_CYCLE    | 41  | 1,86 | 0.026 |
| GOBP_DNA_REPLICATION_INITIATION                                            | 38  | 1,81 | 0.037 |
| GOCC_NUCLEAR_REPLICATION_FORK                                              | 28  | 1,85 | 0.007 |
| GOCC_REPLICATION_FORK                                                      | 60  | 1,84 | 0.007 |
| GOCC_CONDENSED_CHROMOSOME_CENTROMERIC_REGION                               | 156 | 1,83 | 0.006 |
| GOCC_CHROMOSOME_CENTROMERIC_REGION                                         | 226 | 1,76 | 0.014 |
| GOCC_REPLISOME                                                             | 15  | 1,69 | 0.023 |
| <b>Fatty Acid metabolism</b>                                               |     |      |       |
| KEGG_BIOSYNTHESIS_OF_UNSATURATED_FATTY_ACIDS                               | 22  | 1,60 | 0.037 |
| KEGG_FATTY_ACID_METABOLISM                                                 | 42  | 1,59 | 0.042 |
| REACTOME_FATTY_ACID_METABOLISM                                             | 177 | 1,72 | 0.023 |
| REACTOME_MITOCHONDRIAL_FATTY_ACID_BETA_OXIDATION                           | 37  | 1,64 | 0.044 |
| <b>Glucose metabolism</b>                                                  |     |      |       |
| HALLMARK_GLYCOLYSIS                                                        | 199 | 1,57 | 0.015 |
| KEGG_GLYCOLYSIS_GLUONEOGENESIS                                             | 61  | 1,56 | 0.046 |
| KEGG_ONE_CARBON_POOL_BY_FOLATE                                             | 17  | 1,55 | 0.050 |
| KEGG_PENTOSE_PHOSPHATE_PATHWAY                                             | 26  | 1,54 | 0.050 |
| REACTOME_GLUONEOGENESIS                                                    | 33  | 1,72 | 0.023 |
| KEGG_PYRUVATE_METABOLISM                                                   | 40  | 1,58 | 0.041 |
| <b>Immune checkpoint control</b>                                           |     |      |       |
| REACTOME_PD_1_SIGNALING                                                    | 23  | 1,97 | 0.002 |
| <b>Immune response</b>                                                     |     |      |       |
| REACTOME_IMMUNOREGULATORY_INTERACTIONS_BETWEEN_A_LYMPHOID_AND_A_NON_LYMPHC | 184 | 1,75 | 0.020 |
| REACTOME_INTERFERON_GAMMA_SIGNALING                                        | 92  | 1,74 | 0.021 |
| GOBP_ANTIGEN_PROCESSING_AND_PRESENTATION                                   | 107 | 1,91 | 0.013 |
| GOBP_ANTIGEN_PROCESSING_AND_PRESENTATION_OF_ENDOGENOUS_ANTIGEN             | 26  | 1,84 | 0.032 |
| GOBP_LYMPHOCYTE_MEDIATED_IMMUNITY                                          | 351 | 1,83 | 0.034 |
| GOBP_PEPTIDE_ANTIGEN_ASSEMBLY_WITH_MHC_CLASS_II_PROTEIN_COMPLEX            | 16  | 1,83 | 0.036 |
| GOBP_PEPTIDE_ANTIGEN_ASSEMBLY_WITH_MHC_PROTEIN_COMPLEX                     | 20  | 1,82 | 0.034 |
| EPTORS_BUILT_FROM_IMMUNOGLOBULIN_SUPERFAMILY_DOMAINS                       | 357 | 1,82 | 0.034 |
| GOBP_ANTIGEN_PROCESSING_AND_PRESENTATION_OF_EXOGENOUS_ANTIGEN              | 47  | 1,82 | 0.034 |
| GOBP_MACROPHAGE_MIGRATION                                                  | 53  | 1,80 | 0.042 |
| GOBP_CELLULAR_RESPONSE_TO_INTERFERON_GAMMA                                 | 113 | 1,80 | 0.043 |
| GOBP_T_CELL_MEDIATED_IMMUNITY                                              | 111 | 1,79 | 0.046 |
| GOBP_B_CELL_MEDIATED_IMMUNITY                                              | 208 | 1,79 | 0.049 |
| GOCC_MHC_PROTEIN_COMPLEX                                                   | 26  | 1,91 | 0.003 |
| GOCC_IMMUNOGLOBULIN_COMPLEX_CIRCULATING                                    | 67  | 1,85 | 0.007 |
| GOCC_T_CELL_RECEPTOR_COMPLEX                                               | 39  | 1,84 | 0.006 |
| GOCC_MHC_CLASS_II_PROTEIN_COMPLEX                                          | 17  | 1,78 | 0.011 |
| GOCC_IMMUNOGLOBULIN_COMPLEX                                                | 146 | 1,76 | 0.014 |
| GOMF_ANTIGEN_BINDING                                                       | 156 | 1,87 | 0.012 |
| GOMF_MHC_PROTEIN_COMPLEX_BINDING                                           | 36  | 1,83 | 0.022 |
| GOMF_MHC_CLASS_II_PROTEIN_COMPLEX_BINDING                                  | 27  | 1,80 | 0.027 |
| GOMF_IMMUNOGLOBULIN_RECEPTOR_BINDING                                       | 70  | 1,78 | 0.031 |

|                                                         |     |      |       |
|---------------------------------------------------------|-----|------|-------|
| <b>Interleukins</b>                                     |     |      |       |
| IL17PATHWAY                                             | 14  | 1.64 | 0.031 |
| REACTOME_INTERLEUKIN_10_SIGNALING                       | 46  | 1,84 | 0.007 |
| REACTOME_INTERLEUKIN_4_AND_INTERLEUKIN_13_SIGNALING     | 110 | 1,63 | 0.048 |
| <b>KRAS pathway</b>                                     |     |      |       |
| HALLMARK_KRAS_SIGNALING_UP                              | 195 | 1.51 | 0.024 |
| <b>MYC regulates genes</b>                              |     |      |       |
| HALLMARK_MYC_TARGETS_V1                                 | 200 | 1.64 | 0.008 |
| <b>NFkB</b>                                             |     |      |       |
| NFKB_TARGET_GENES                                       | 23  | 1.98 | 0.000 |
| NFKB_DLBCL_NATURE_2009_COMPAGNO                         | 109 | 1.94 | 0.001 |
| NFKB_ALL_OCILY3_LY10                                    | 57  | 1.87 | 0.003 |
| NIK_SIGNATURE                                           | 26  | 1.84 | 0.003 |
| NFKB_PATHWAY_MODULATED_BY_IBRUTINIB                     | 39  | 1.83 | 0.004 |
| NFKB_BOTHOCILY3ANDLY10                                  | 33  | 1.76 | 0.010 |
| NFKB_SIGNATURE                                          | 18  | 1.74 | 0.011 |
| REACTOME_DECTIN_1_MEDIATED_NONCANONICAL_NF_KB_SIGNALING | 62  | 1,81 | 0.011 |
| <b>Oxidative phosphorylation</b>                        |     |      |       |
| HALLMARK_OXIDATIVE_PHOSPHORYLATION                      | 200 | 1.86 | 0.001 |
| KEGG_OXIDATIVE_PHOSPHORYLATION                          | 129 | 1.71 | 0.011 |
| REACTOME_MITOCHONDRIAL_TRANSLATION                      | 94  | 1,96 | 0.002 |
| REACTOME_RESPIRATORY_ELECTRON_TRANSPORT                 | 103 | 1,73 | 0.022 |
| GOBP_MITOCHONDRIAL_RESPIRATORY_CHAIN_COMPLEX_ASSEMBLY   | 94  | 1.86 | 0.025 |
| GOBP_OXIDATIVE_PHOSPHORYLATION                          | 136 | 1.84 | 0.034 |
| GOBP_ELECTRON_TRANSPORT_CHAIN                           | 165 | 1.78 | 0.049 |
| GOCC_MITOCHONDRIAL_PROTEIN_CONTAINING_COMPLEX           | 279 | 1.93 | 0.002 |
| GOCC_INNER_MITOCHONDRIAL_MEMBRANE_PROTEIN_COMPLEX       | 153 | 1.81 | 0.008 |
| GOCC_PROTON_TRANSPORTING_ATP_SYNTHASE_COMPLEX           | 21  | 1.73 | 0.017 |
| GOCC_RESPIRASOME                                        | 100 | 1.71 | 0.018 |
| GOCC_NADH_DEHYDROGENASE_COMPLEX                         | 49  | 1.62 | 0.044 |
| GOMF_ELECTRON_TRANSFER_ACTIVITY                         | 124 | 1.77 | 0.030 |
| <b>p53</b>                                              |     |      |       |
| REACTOME_STABILIZATION_OF_P53                           | 57  | 1,65 | 0.040 |
| <b>Proliferation</b>                                    |     |      |       |
| MCL_PROLIFERATION_SIGNATURE                             | 14  | 1.90 | 0.002 |
| <b>Proteasome</b>                                       |     |      |       |
| KEGG_PROTEASOME                                         | 44  | 1.71 | 0.011 |
| GOCC_PROTEASOME_CORE_COMPLEX                            | 20  | 1.70 | 0.022 |
| <b>Protein synthesis</b>                                |     |      |       |
| KEGG_RIBOSOME                                           | 88  | 1.82 | 0.002 |
| GOCC_RIBOSOMAL_SUBUNIT                                  | 177 | 2.01 | 0.001 |
| GOCC_ORGANELLAR_RIBOSOME                                | 81  | 1.99 | 0.000 |
| GOCC_LARGE_RIBOSOMAL_SUBUNIT                            | 111 | 1.96 | 0.001 |
| GOCC_MITOCHONDRIAL_LARGE_RIBOSOMAL_SUBUNIT              | 54  | 1.90 | 0.003 |
| GOCC_RIBOSOME                                           | 208 | 1.83 | 0.007 |
| GOCC_SMALL_RIBOSOMAL_SUBUNIT                            | 69  | 1.74 | 0.015 |
| GOCC_CYTOSOLIC_RIBOSOME                                 | 101 | 1.71 | 0.019 |
| GOCC_CYTOSOLIC_LARGE_RIBOSOMAL_SUBUNIT                  | 57  | 1.69 | 0.023 |
| REACTOME_EUKARYOTIC_TRANSLATION_INITIATION              | 120 | 1,65 | 0.040 |
| <b>Redox balance</b>                                    |     |      |       |
| KEGG_PEROXISOME                                         | 78  | 1.59 | 0.040 |
| REACTOME_DETOXIFICATION_OF_REACTIVE_OXYGEN_SPECIES      | 36  | 1,64 | 0.042 |
| GOCC_OXIDOREDUCTASE_COMPLEX                             | 120 | 1.73 | 0.017 |
| AS_ACCEPTOR                                             | 57  | 1.73 | 0.046 |
| <b>RNA synthesis</b>                                    |     |      |       |
| REACTOME_LAGGING_STRAND_SYNTHESIS                       | 20  | 1,87 | 0.006 |
| REACTOME_EUKARYOTIC_TRANSLATION_ELONGATION              | 94  | 1,86 | 0.006 |
| REACTOME_TELOMERE_C_STRAND_LAGGING_STRAND_SYNTHESIS     | 34  | 1,82 | 0.010 |
| REACTOME_TRANSLATION                                    | 293 | 1,8  | 0.013 |
| <b>Telomeres</b>                                        |     |      |       |
| REACTOME_EXTENSION_OF_TELOMERES                         | 51  | 1,77 | 0.016 |
| REACTOME_TELOMERE_MAINTENANCE                           | 108 | 1,75 | 0.018 |
| <b>TNF</b>                                              |     |      |       |
| REACTOME_TNFS_BIND_THEIR_PHYSIOLOGICAL_RECEPTORS        | 29  | 1,69 | 0.027 |
| REACTOME_TNFR2_NON_CANONICAL_NF_KB_PATHWAY              | 101 | 1,67 | 0.033 |
| GOMF_TUMOR_NECROSIS_FACTOR_RECEPTOR_BINDING             | 31  | 1.75 | 0.037 |

**Table S5. Complete GSEA results of MCL-PDLs compared to MCL-2D co-cultures**

| GENE SET                                                            | SIZE | NES  | FDR q-val | CLASS                 |
|---------------------------------------------------------------------|------|------|-----------|-----------------------|
| REACTOME_CROSS_PRESENTATION_OF_SOLUBLE_EXOGENOUS_ANTIGENS_ENDOSOMES | 50   | 1.88 | 0.048     | Ag presentation       |
| HALLMARK_ANGIOGENESIS                                               | 33   | 1.72 | 0.042     | Angiogenesis          |
| REACTOME_ADHERENS_JUNCTIONS_INTERACTIONS                            | 33   | 1.91 | 0.028     | Cell adhesion         |
| REACTOME_SCF_SKP2_MEDIATED_DEGRADATION_OF_P27_P21                   | 60   | 1.87 | 0.044     | Cell cycle            |
| REACTOME_CDT1_ASSOCIATION_WITH_THE_CDC6_ORC_ORIGIN_COMPLEX          | 59   | 1.90 | 0.032     | DNA replication       |
| REACTOME_EXTRACELLULAR_MATRIX_ORGANIZATION                          | 295  | 1.98 | 0.003     | Extracellular matrix  |
| REACTOME_ACTIVATION_OF_MATRIX_METALLOPROTEINASES                    | 31   | 1.89 | 0.038     | Extracellular matrix  |
| GOCC_COLLAGEN_CONTAINING_EXTRACELLULAR_MATRIX                       | 413  | 2.03 | <0.001    | Extracellular matrix  |
| GOCC_COLLAGEN_TRIMER                                                | 84   | 1.94 | 0.009     | Extracellular matrix  |
| GOMF_EXTRACELLULAR_MATRIX_STRUCTURAL_CONSTITUENT                    | 165  | 2.08 | <0.001    | Extracellular matrix  |
| GOMF_COLLAGEN_BINDING                                               | 65   | 2.01 | 0.002     | Extracellular matrix  |
| REACTOME_DECTIN_2_FAMILY                                            | 26   | 1.89 | 0.039     | Immune response       |
| HALLMARK_EPITHELIAL_MESENCHYMAL_TRANSITION                          | 198  | 1.72 | 0.034     | Metastasis            |
| BIOCARTA_RACC_PATHWAY                                               | 15   | 1.90 | 0.048     | Ion channel activity  |
| GOMF_EXTRACELLULAR_LIGAND_GATED_ION_CHANNEL_ACTIVITY                | 73   | 1.93 | 0.023     | Ion channel activity  |
| GOMF_LIGAND_GATED_ION_CHANNEL_ACTIVITY                              | 144  | 1.90 | 0.044     | Ion channel activity  |
| GOCC_ION_CHANNEL_COMPLEX                                            | 286  | 1.93 | 0.009     | Ion channel activity  |
| HALLMARK_KRAS_SIGNALING_UP                                          | 195  | 1.84 | 0.015     | KRAS                  |
| HALLMARK_MYC_TARGETS_V1                                             | 200  | 1.83 | 0.010     | MYC                   |
| REACTOME_NEGATIVE_REGULATION_OF_NOTCH4_SIGNALING                    | 54   | 1.88 | 0.042     | Notch pathway         |
| E47_02                                                              | 249  | 1.72 | 0.014     | Stemness              |
| KEGG_PROTEASOME                                                     | 44   | 1.97 | 0.004     | Proteasome            |
| REACTOME_DISEASES_ASSOCIATED_WITH_O_GLYCOSYLATION_OF_PROTEINS       | 68   | 1.98 | 0.003     | Protein glycosylation |
| REACTOME_O_GLYCOSYLATION_OF_TSR_DOMAIN_CONTAINING_PROTEINS          | 39   | 1.94 | 0.012     | Protein glycosylation |
| REACTOME_DEFECTIVE_GALNT3_CAUSES_HFTC                               | 16   | 1.92 | 0.026     | Protein glycosylation |
| REACTOME_TERMINATION_OF_O_GLYCAN_BIOSYNTHESIS                       | 23   | 1.91 | 0.028     | Protein glycosylation |
| REACTOME_DEFECTIVE_C1GALT1C1_CAUSES_TNPS                            | 17   | 1.87 | 0.046     | Protein glycosylation |

GSEA was used to test for significant enrichment of defined gene signatures. NES indicates Normalized Enriched Score; FDR, False Discovery Rate. Threshold FDR<0.05 and NES>1.5. Custom genes set were experimentally derived and downloaded from <http://lymphochip.nih.gov/signaturedb/index.html>. C2CP, C3, C5 and H gene sets were obtained from the Molecular Signature Database (v2.5).



**Table S6. Leading edge genes of specific signatures from Figure 3E**

**Myc**

|        |           |        |         |
|--------|-----------|--------|---------|
| AIMP2  | H2AZ1     | NOP16  | RRM1    |
| AP3S1  | HDAC2     | NPM1   | RRP9    |
| APEX1  | HDGF      | ODC1   | RUVBL2  |
| C1QBP  | HNRNPA1   | PCNA   | SERBP1  |
| CBX3   | HNRNPA2B1 | POLD2  | SET     |
| CCT2   | HNRNPA3   | POLE3  | SF3B3   |
| CCT3   | HNRNPC    | PPIA   | SLC25A3 |
| CCT4   | HNRNPD    | PPM1G  | SNRPA   |
| CCT5   | HNRNPR    | PRDX4  | SNRPA1  |
| CCT7   | HNRNPU    | PRPF31 | SNRPB2  |
| CDC20  | HPRT1     | PSMA1  | SNRPD1  |
| CDC45  | HSP90AB1  | PSMA2  | SNRPD2  |
| CDK4   | HSPD1     | PSMA4  | SNRPG   |
| CLNS1A | HSPE1     | PSMA6  | SRM     |
| CNBP   | IARS1     | PSMA7  | SRSF2   |
| COPS5  | IFRD1     | PSMB2  | SRSF3   |
| COX5A  | ILF2      | PSMB3  | SRSF7   |
| CTPS1  | KARS1     | PSMC4  | SSB     |
| DEK    | KPNA2     | PSMC6  | SSBP1   |
| EEF1B2 | LDHA      | PSMD1  | SYNCRIP |
| EIF1AX | LSM7      | PSMD14 | TARDBP  |
| EIF2S1 | MAD2L1    | PSMD3  | TCP1    |
| EIF2S2 | MCM2      | PSMD7  | TOMM70  |
| EIF3B  | MCM4      | PTGES3 | TRA2B   |
| EIF4A1 | MCM6      | PWP1   | TRIM28  |
| EIF4E  | MCM7      | RAN    | TUFM    |
| ERH    | MRPL23    | RANBP1 | TXNL4A  |
| EXOSC7 | MRPL9     | RFC4   | UBE2L3  |
| FBL    | MRPS18B   | RPL18  | USP1    |
| GLO1   | NDUFAB1   | RPL34  | VBP1    |
| GNL3   | NHP2      | RPL6   | XRCC6   |
| GOT2   | NME1      | RPS2   | YWHAE   |
| GSPT1  | NOLC1     | RPS5   |         |

**Collagen**

|         |         |        |       |
|---------|---------|--------|-------|
|         | COL7A1  | LGALS9 | TNC   |
|         | CRELD1  | LTBP3  | USH2A |
| C1QB    | CTSL    | MMP9   | VWF   |
| C1QC    | EGFLAM  | PTPRZ1 | WNT5B |
| CCDC80  | FRAS1   | S100A4 | ZP3   |
| COL12A1 | HSP90B1 | SEMA3B |       |
| COL6A3  | ITIH4   | THBS1  |       |

**ECM org**

COL12A1  
COL22A1  
COL6A3  
COL7A1  
CTSL  
LRP4  
MMP16  
MMP19  
MMP9  
NRXN1  
SPP1  
THBS1  
TNC  
VWF

**E47\_02**

GABRE  
COL22A1  
MMP16  
DOC2B  
BTBD3  
CASKIN2  
FGF13  
ELP5  
ERBB3  
SNAP25  
TPI1
